# Supplementary material for: A Phase I Study of Autologous Dendritic Cell Vaccine Pulsed with Allogeneic Stem-like Cell Line Lysate in Patients with Newly Diagnosed or Recurrent Glioblastoma
Source: Oxford University Press journal article supplement (doi:10.1158/1078-0432.ccr-21-2867), 2021-12-02
Supplement: ccr-21-2867_supplementary_legend_supp0.docx [file ccr-21-2867_supplementary_legend_supp0.docx]

**Supplementary Figure 1.** Stem cell marker expression of CSC6:

(A) Co-expression of neural stem cell markers Nestin and SOX2 in left panel, and CD133 and SSEA-1 in right panel. RT-PCR analysis shows expression of Nestin (270bp) and SOX 2 (2512bp) at the mRNA level, compared to GAPDH (118bp next to ladder).

(B) Expression of “stemness” markers CD133 and SSEA-1 in the left panel and Nestin in the right panel during mitotic metaphase of CSC6 cells.

(C) Expression of SSEA-1 and SSEA-4 left panel: DAPI staining upper left, SSEA-1 expression upper right, SSEA-4 lower left quadrant, SSEA-1 and SSEA-4 double labeling lower right quadrant. Expression of SSEA-1 and SSEA-5 right panel: DAPI staining upper left, SSEA-1 expression upper right, SSEA-5 lower left quadrant, SSEA-1 and SSEA-5 double labeling lower right quadrant. Arrowhead indicates coexpression of SSEA-1 and SSEA-5 and arrows indicate independent expression.
